# Supplementary material for: A facile recrystallization strategy for fabrication of nanocrystalline microspheres of sulfatic sodalite with high thermal stability
Source: Royal Society of Chemistry journal article supplement (doi:10.1039/d3ce01012k), 2023-11-17
Supplement: d3ce01012k1.pdf [file d3ce01012k1.pdf]

## Supporting information

# A facile recrystallization strategy for fabrication of nanocrystalline microspheres of sulfatic sodalite with high thermal stability

Xiu-Zhen Xie,<sup>a</sup> Yuanming Pan,<sup>b</sup> and Jin-Xiao Mi\*<sup>,a</sup>

<sup>a</sup>Department of Materials Science and Engineering, College of Materials, Xiamen University, No. 422 Siming South Road, Xiamen 361005, Fujian Province, People's Republic of China. \* Correspondent E-mail: jxmi@xmu.edu.cn

<sup>b</sup>Department of Geological Sciences, University of Saskatchewan, Saskatoon, SK S7N 5E2, Canada.

**Table S1 Sample codes, synthesis conditions, Si/Al ratios and phases**

| Sample Codes | pH of gel | Temp. ( °C) | Time (h) | Si/Al ratio | Phases                                                                           |
|--------------|-----------|-------------|----------|-------------|----------------------------------------------------------------------------------|
| SOD-1        | /         | 200         | 4        | 1.06        | B-sodalite                                                                       |
| gel-4        | 4         | /           | /        | 0.96        | thenardite (Na <sub>2</sub> SO <sub>4</sub> ), C-Na <sub>2</sub> SO <sub>4</sub> |
| gel-6        | 6         | /           | /        | 1.14        | thenardite (Na <sub>2</sub> SO <sub>4</sub> ), C-Na <sub>2</sub> SO <sub>4</sub> |
| gel-8        | 8         | /           | /        | 1.24        | thenardite (Na <sub>2</sub> SO <sub>4</sub> )                                    |
| gel-10       | 10        | /           | /        | 0.97        | C-Na <sub>2</sub> SO <sub>4</sub> ( <i>Cmcm</i> (63))                            |
| gel-12       | 12        | /           | /        | 1.02        | thenardite (Na <sub>2</sub> SO <sub>4</sub> ), S-sodalite                        |
| gel-14       | 14        | /           | /        | 1.10        | thenardite (Na <sub>2</sub> SO <sub>4</sub> ), S-sodalite                        |
| SOD-2-4      | 4         | 100         | 48       | 0.13        | C-Na <sub>2</sub> SO <sub>4</sub> , natroalunite                                 |
| SOD-2-6      | 6         | 100         | 48       | 0.49        | C-Na <sub>2</sub> SO <sub>4</sub> ( <i>Cmcm</i> (63))                            |
| SOD-2-8      | 8         | 100         | 48       | 1.14        | thenardite (Na <sub>2</sub> SO <sub>4</sub> )                                    |
| SOD-2-10     | 10        | 100         | 48       | 1.06        | thenardite (Na <sub>2</sub> SO <sub>4</sub> )                                    |
| SOD-2-12     | 12        | 100         | 48       | 1.11        | S-sodalite, thenardite (Na <sub>2</sub> SO <sub>4</sub> )                        |
| SOD-2-14     | 14        | 100         | 48       | 1.11        | S-sodalite                                                                       |

\* There are two polymorphs of Na<sub>2</sub>SO<sub>4</sub> observed in the system. One is thenardite (Na<sub>2</sub>SO<sub>4</sub>, *Fddd*(70), PDF#37-1465) while the other is C-Na<sub>2</sub>SO<sub>4</sub> (*Cmcm*(63), PDF#79-1553).

**Table S2 Powder X-ray diffraction pattern indexing and refinement for SOD-1 (B-sodalite)**

| ( <i>h k l</i> ) | 2 $\theta$ (Calc.) | 2 $\theta$ (Obs.) | $\Delta 2\theta$ | <i>d</i> (Calc.) | <i>d</i> (Obs.) | <i>I</i> (height)% | <i>I</i> (Area)% |
|------------------|--------------------|-------------------|------------------|------------------|-----------------|--------------------|------------------|
| (1 1 0)          | 14.061             | 14.041            | 0.020            | 6.2932           | 6.3022          | 47                 | 39               |
| (2 0 0)          | 19.936             | 19.944            | -0.008           | 4.4500           | 4.4483          | 4                  | 4                |
| (2 1 0)          | 22.318             | 22.310            | 0.008            | 3.9802           | 3.9815          | 1.5                | 2                |
| (2 1 1)          | 24.479             | 24.472            | 0.007            | 3.6334           | 3.6344          | 100                | 100              |
| (2 2 0)          | 28.340             | 28.344            | -0.005           | 3.1466           | 3.1461          | 3                  | 3                |
| (2 2 1)          | 30.098             | 30.072            | 0.026            | 2.9666           | 2.9691          | 1.6                | 3                |
| (0 1 3)          | 31.768             | 31.768            | 0.000            | 2.8144           | 2.8145          | 24                 | 29               |
| (2 2 2)          | 34.893             | 34.888            | 0.005            | 2.5692           | 2.5696          | 30                 | 37               |
| (1 2 3)          | 37.790             | 37.784            | 0.006            | 2.3786           | 2.3790          | 7                  | 9                |
| (4 1 1)          | 43.086             | 43.080            | 0.006            | 2.0977           | 2.0980          | 23                 | 33               |
| (0 2 4)          | 45.543             | 45.561            | -0.017           | 1.9901           | 1.9894          | 1.1                | 1.4              |
| (3 3 2)          | 47.901             | 47.929            | -0.028           | 1.8975           | 1.8964          | 0.9                | 1.4              |
| (4 2 2)          | 50.175             | 50.183            | -0.008           | 1.8167           | 1.8164          | 4                  | 7                |
| (1 3 4)          | 52.376             | 52.376            | 0.000            | 1.7454           | 1.7454          | 6                  | 10               |
| (5 2 1)          | 56.595             | 56.600            | -0.006           | 1.6249           | 1.6248          | 0.5                | 0.7              |
| (4 4 0)          | 58.628             | 58.632            | -0.004           | 1.5733           | 1.5732          | 5                  | 10               |

\* Refined cell parameters:  $a = b = c = 8.8999$  (3) Å,  $\alpha = \beta = \gamma = 90^\circ$ ,  $V = 704.96$  Å<sup>3</sup>, space group:  $P\bar{4}3n$ ,  $|\Delta 2\theta| = 0.0053^\circ$ ,  $F(12) = 126.7(18)$ . Abbreviation: Calc. and Obs. are abbreviated for calculated and observed, respectively.

**Table S3 Powder X-ray diffraction pattern indexing and refinement for SOD-2 using a cubic cell**

| ( <i>h k l</i> ) | 2 $\theta$ (Calc.) | 2 $\theta$ (Obs.) | $\Delta 2\theta$ | <i>d</i> (Calc.) | <i>d</i> (Obs.) | <i>I</i> (Obs.)% | <i>I</i> (Calc.)* | Note      |
|------------------|--------------------|-------------------|------------------|------------------|-----------------|------------------|-------------------|-----------|
| (1 1 0)          | 13.856             | 13.880            | -0.025           | 6.3861           | 6.3748          | 73.6             | 34.7              |           |
|                  | 22.281             |                   |                  |                  | 3.9866          | 11.0             |                   | Diaspore  |
| (2 1 1)          | 24.118             | 24.168            | -0.050           | 3.6870           | 3.6795          | 100.0            | 100.0             |           |
| (0 1 3)          | 31.294             | 31.302            | -0.008           | 2.8560           | 2.8552          | 9.1              | 13.9              |           |
| (2 2 2)          | 34.369             | 34.312            | 0.058            | 2.6071           | 2.6114          | 26.8             | 25.5              |           |
| (3 3 0)          | 42.428             | 42.456            | -0.027           | 2.1287           | 2.1274          | 20.1             | 8.3               |           |
| (5 1 0)          | 51.557             | 51.608            | -0.051           | 1.7712           | 1.7696          | 9.8              | 14.0              |           |
| (4 4 0)          | 57.694             | 57.643            | 0.051            | 1.5965           | 1.5978          | 4.7              | 9.6               |           |
|                  | 57.911             |                   |                  |                  | 1.5899          | 7.1              |                   | Unindexed |

\* Refined cell parameters:  $a = 9.031$ (4) Å,  $V = 736.64$  Å<sup>3</sup>, space group:  $P\bar{4}3n$ ,  $|\Delta 2\theta| = 0.0386^\circ$ ,  $F(7) = 25.9$ (7). The calculated intensities were obtained from the calculation of using single crystal data of nosean (I. Hassan, H.D. Grundy, Can. Mineral. 27 (1989) 165-172). Abbreviation: Calc. and Obs. are abbreviated for calculated and observed, respectively.

**Table S4 Powder X-ray diffraction pattern indexing and refinement for SOD-2 using a rhombohedral cell**

| ( <i>h k l</i> ) | 2 $\theta$ (Calc.) | 2 $\theta$ (Obs.) | $\Delta 2\theta$ | <i>d</i> (Calc.) | <i>d</i> (Obs.) | <i>I</i> (height)% | <i>I</i> (Area)% | CS(Å) |
|------------------|--------------------|-------------------|------------------|------------------|-----------------|--------------------|------------------|-------|
| (1 0 1)          | 13.904             | 13.880            | 0.023            | 6.3642           | 6.3748          | 73                 | 49               | 627   |
| (2 1 1)          | 24.144             | 24.168            | -0.023           | 3.6830           | 3.6795          | 100                | 100              | 368   |
| (1 3 1)          | 31.314             | 31.289            | 0.024            | 2.8542           | 2.8564          | 9                  | 13               |       |
| (4 0 1)          | 34.387             | 34.311            | 0.076            | 2.6058           | 2.6114          | 28                 | 37               | 260   |
| (4 1 0)          | 37.216             | 37.192            | 0.025            | 2.4140           | 2.4155          | 5                  | 5                |       |
| (0 5 1)          | 42.442             | 42.456            | -0.014           | 2.1281           | 2.1274          | 20                 | 28               | 253   |
| (1 5 2)          | 51.612             | 51.608            | 0.004            | 1.7694           | 1.7696          | 9                  | 12               | 284   |
| (4 4 0)          | 57.688             | 57.687            | 0.001            | 1.5967           | 1.5967          | 7                  | 8                |       |
| (4 0 4)          | 57.911             | 57.912            | -0.001           | 1.5910           | 1.5910          | 7                  | 10               |       |

\* CS denotes crystallite size. Refined cell parameters: trigonal system,  $a = b = 12.773$  (3),  $c = 7.781$  (3) Å,  $\alpha = \beta = 90$ ,  $\gamma = 120^\circ$ ,  $V = 1099.43$  Å<sup>3</sup>, space group:  $R3m$ . Abbreviation: Calc. and Obs. are abbreviated for calculated and observed, respectively.

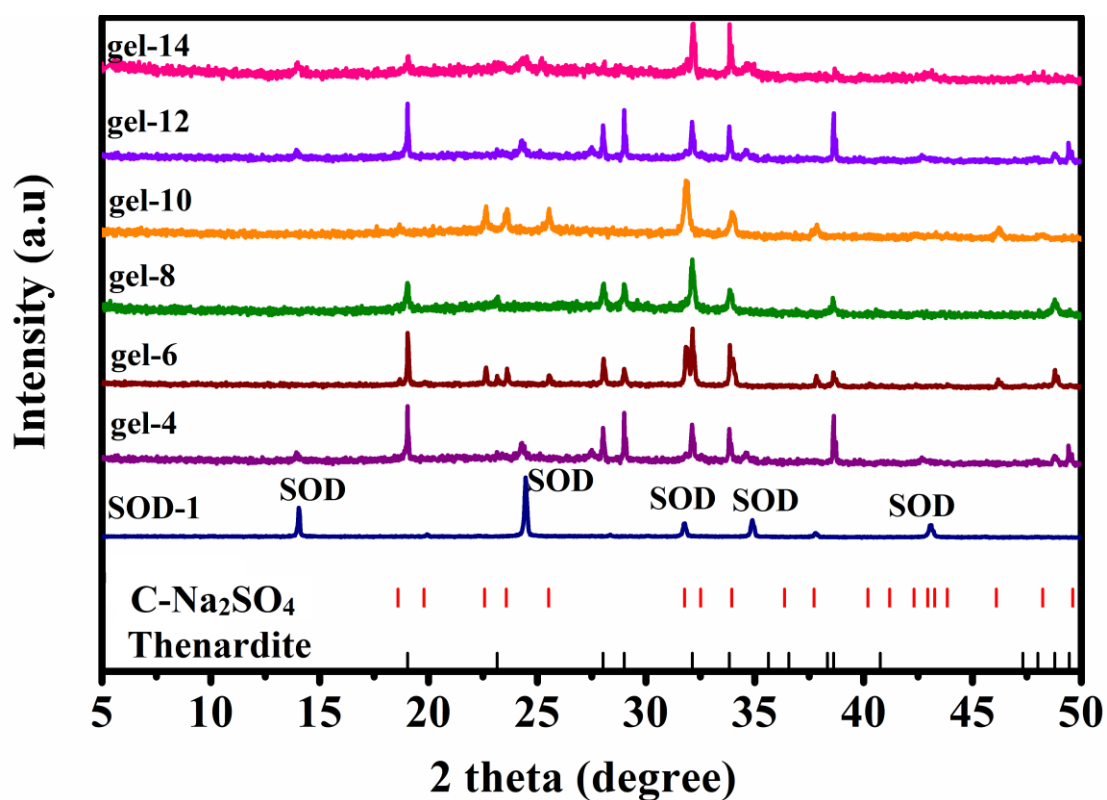

**Figure S1 PXR D patterns of the dried gels formed at different pH values**

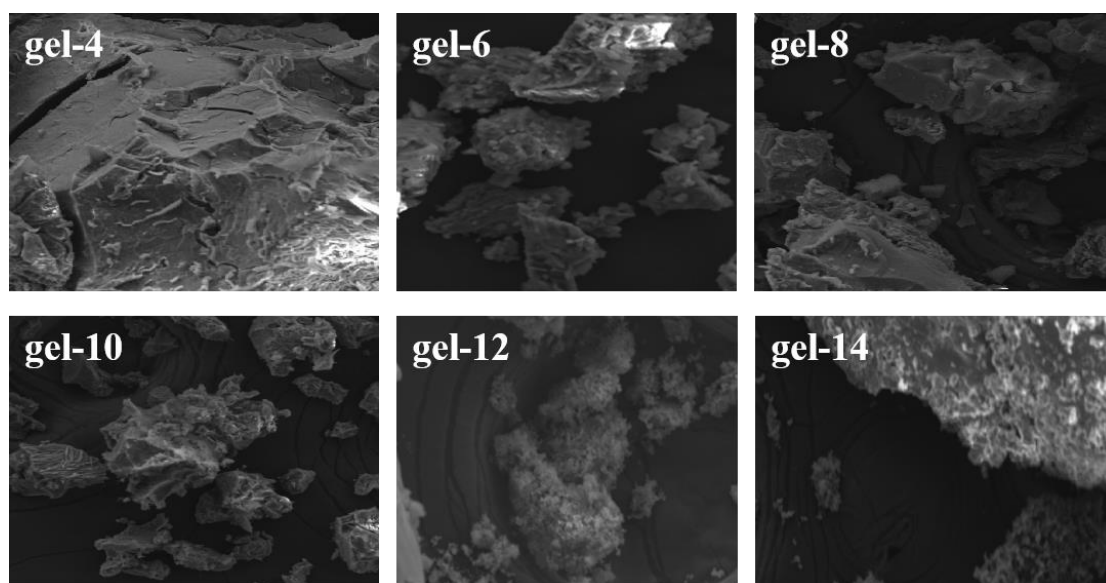

Figure S2 SEM images of the dried gels formed at different pH values

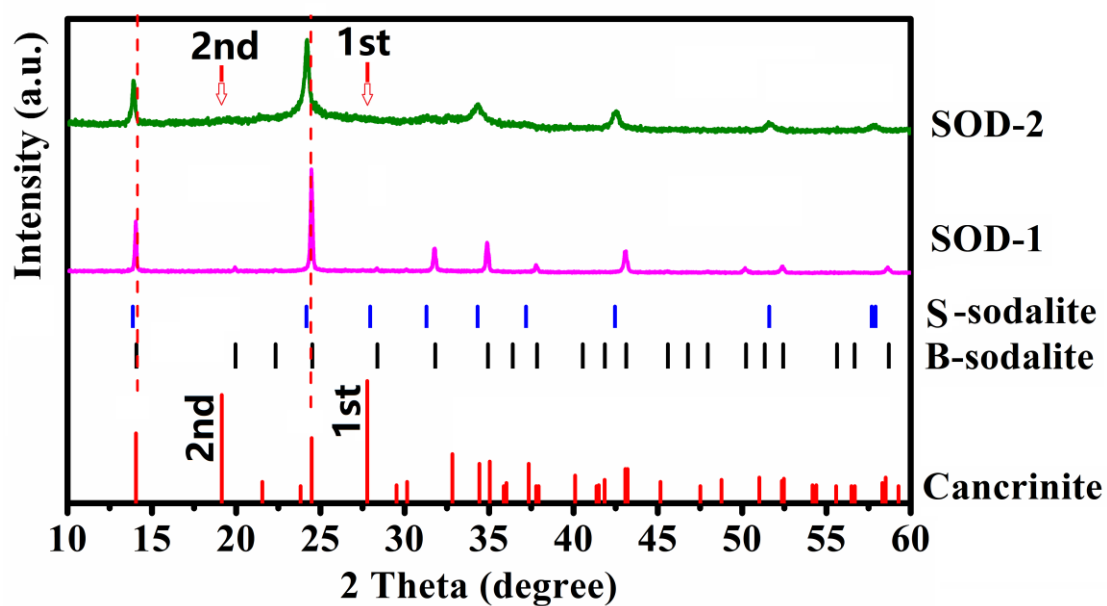

Figure S3 Comparison of PXRD patterns of SOD-1 and SOD-2, and Bragg positions among B-Sodalite, S-sodalite and cancrinite (PDF #34-0176). The arrows labelled 1st and 2nd in SOD-2 PXRD pattern indicate the positions of cancrinite.

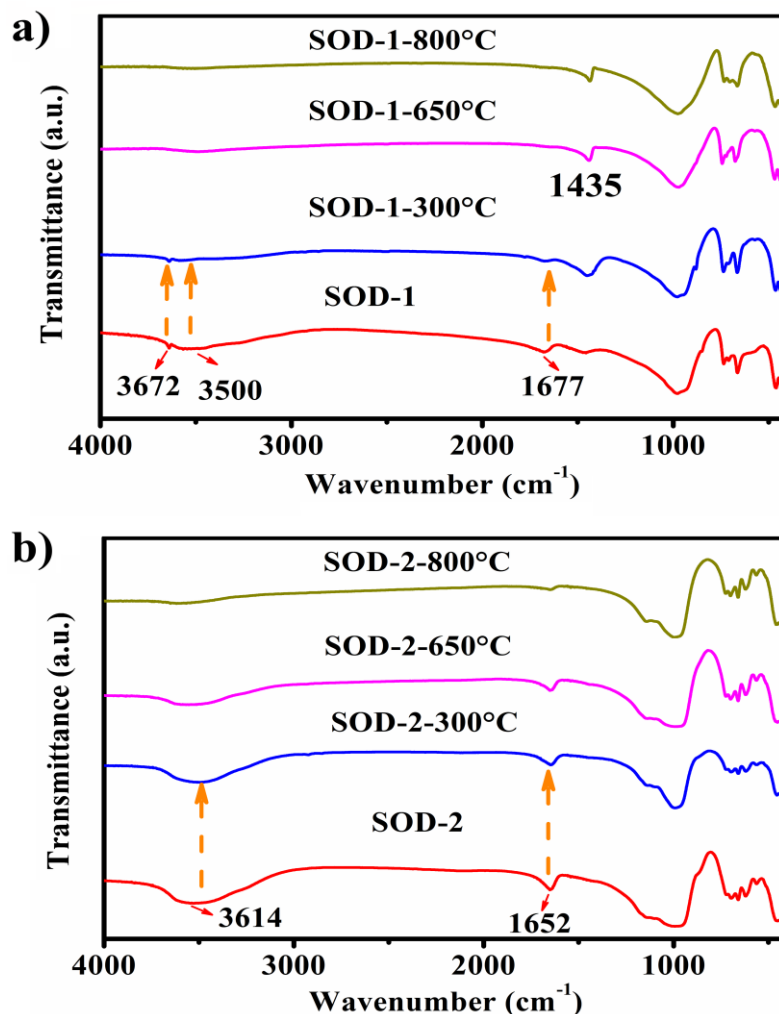

**Figure S4 Comparison of *ex-situ* FT-IR spectra of SOD-1 and SOD-2 samples (the as-is and those after calcination at 300, 650 and 800 °C).**

**Table S5 The chemical composition of samples after calcination at 800 °C measured from a CHNOS elemental analyzer**

| Elements | C (wt.%) | H (wt.%) | S (wt.%) |
|----------|----------|----------|----------|
| SOD-1    | 0.7330   | 0.1216   | 0.1478   |
| SOD-1    | 1.0047   | 0.1710   | 0.1932   |
| SOD-2    | 0.3927   | 0.5584   | 2.1038   |
| SOD-2    | 0.4245   | 0.5879   | 2.9233   |

Note that the samples after calcination at 800 °C for 0.5 h still contain water molecules, which could be absorbed from the air during the waiting time before analyses. The analytical laboratory is located on an island surrounded by the sea.

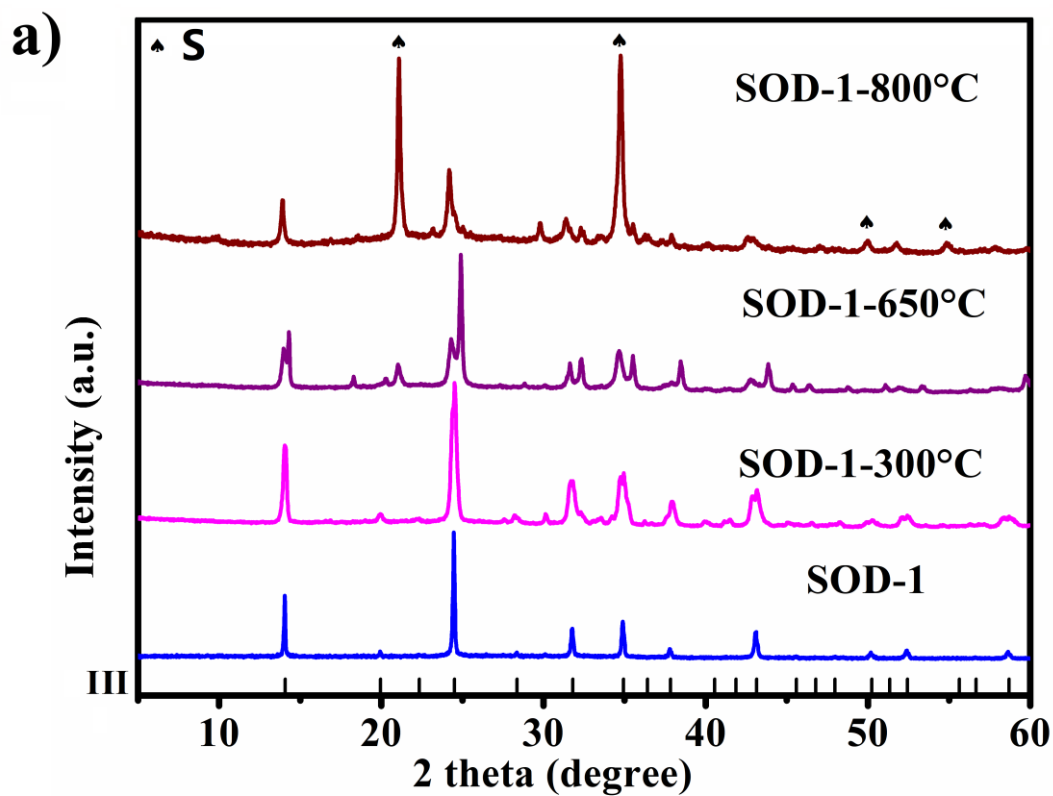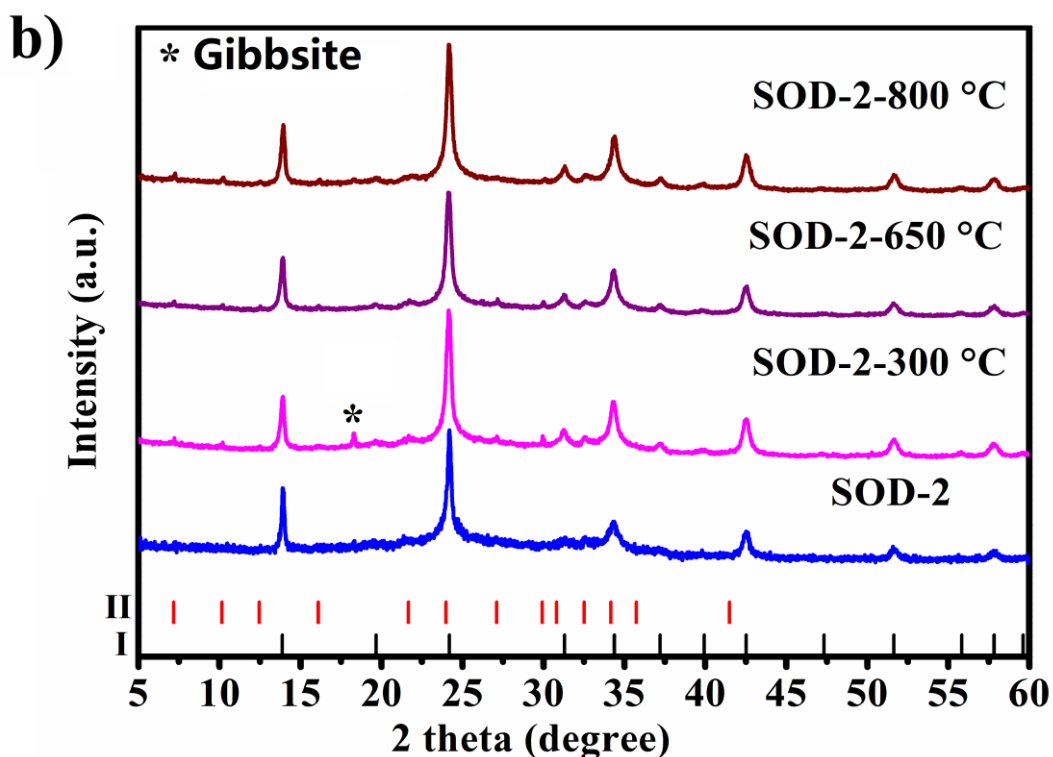

Figure S5 Comparison of *ex-situ* PXRD patterns of the samples of SOD-1 (a) and SOD-2 (b) calcined at 300 °C, 650 °C, and 800 °C, respectively. The vertical bars below the patterns for I, II, and III are the Bragg positions of Zeolite A, S-sodalite, and B-sodalite, respectively. The capitalized letter of S indicates the presence of a sodium aluminum silicate (PDF#10-0033).

**Table S6 Chemical composition of samples from EDX analysis**

| Samples | Element | Weight% | Atomic% |
|---------|---------|---------|---------|
| SOD-1   | O K     | 55.74   | 67.22   |
|         | Na K    | 13.29   | 11.15   |
|         | Al K    | 14.46   | 10.34   |
|         | Si K    | 15.94   | 10.95   |
|         | S K     | 0.46    | 0.28    |
|         | Ca K    | 0.12    | 0.06    |
| SOD-2   | O K     | 52.33   | 64.3    |
|         | Na K    | 14.05   | 12.02   |
|         | Al K    | 14.42   | 10.51   |
|         | Si K    | 16.70   | 11.69   |
|         | S K     | 2.12    | 1.30    |
|         | Ca K    | 0.39    | 0.19    |

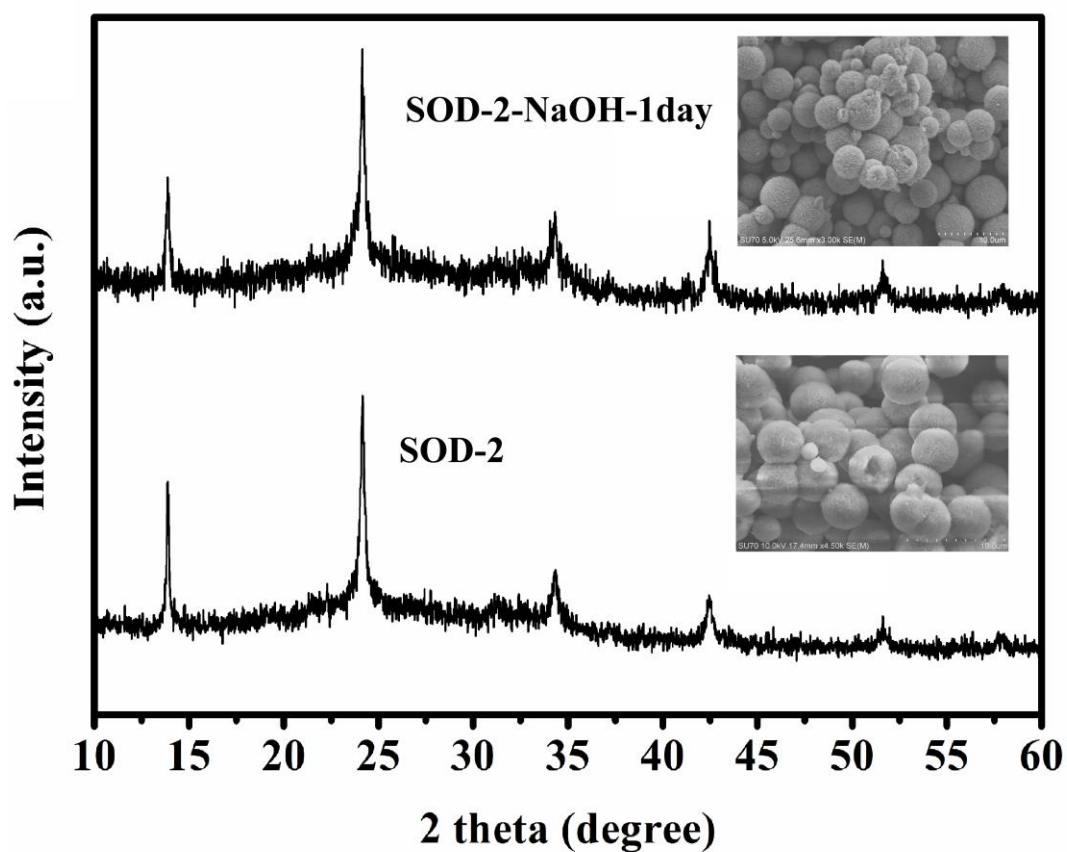

**Figure S6 Comparison of PXRD patterns and SEM images between the pristine sample and the sample immersed in NaOH for 24 h**

Alkali-resistant test of S-sodalite: The sample was immersed in NaOH solution with  $\text{pH} > 14$  for 24 h and the recouped powder was dried overnight in an oven at  $120^{\circ}\text{C}$  prior to be X-rayed.
